# Supplementary material for: Broadband near-infrared (NIR) emission realized by the crystal-field engineering of Y3−xCaxAl5−xSixO12:Cr3+(x= 0–2.0) garnet phosphors
Source: Royal Society of Chemistry journal article supplement (doi:10.1039/c9tc05775g), 2019-12-12
Supplement: c9tc05775g1.pdf [file c9tc05775g1.pdf]

## Supporting Information

Broadband Near-infrared (NIR) emission realized by crystal-field engineering of  $Y_{3-x}Ca_xAl_{5-x}Si_xO_{12}:Cr^{3+}$  ( $x = 0 - 2.0$ ) garnet phosphors

*Minqian Mao<sup>1</sup>, Tianliang Zhou<sup>1\*</sup>, Huatao Zeng<sup>1</sup>, Le Wang<sup>2\*</sup>, Fan Huang<sup>3</sup>, Xueyuan Tang<sup>1</sup> and Rong-Jun Xie<sup>1\*</sup>*

<sup>1</sup>College of Materials, Xiamen University, Xiamen 361005, China

<sup>2</sup>College of Optical and Electronic Technology, China Jiliang University, Hangzhou, Zhejiang 310018, China

<sup>3</sup>Mathematics Application Joint Laboratory of Soochow University and Suzhou Jiaoshi Intelligence Technology Co., Ltd, Soochow University, Suzhou 215006, P. R. China

### Corresponding Authors

\* E-mail: bible2@163.com (T. Z.).

\* E-mail: calla@cjlu.edu.cn (L.W.).

\* E-mail: rjxie@xmu.edu.cn (R.-J.X.).

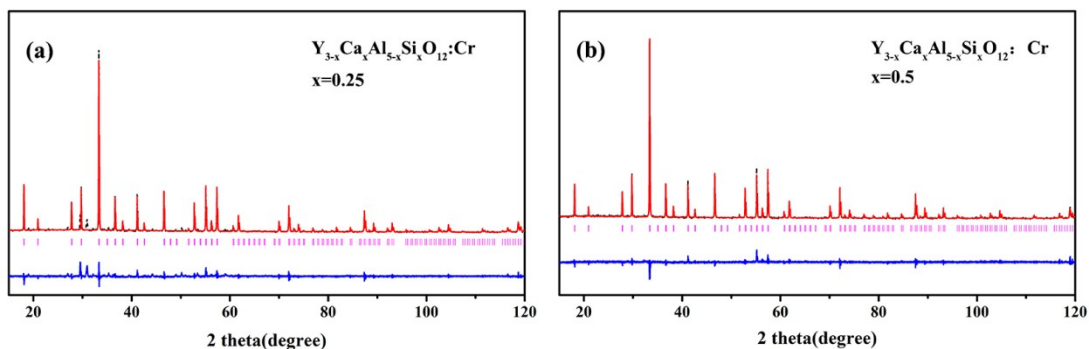

**Figure S1.** Rietveld refinement X-ray diffraction of  $Y_{3-x}Ca_xAl_{5-x}Si_xO_{12}:0.4\%Cr^{3+}$  (a)  $x = 0.25$ ; (b)  $x = 0.5$

**Table S1.** Crystallographic data of  $Y_{3-x}Ca_xAl_{5-x}Si_xO_{12}:0.4\%Cr^{3+}$  with different  $x$  values

| Formula                       | $x = 0.25$ | $x = 0.5$ | $x = 1$  |
|-------------------------------|------------|-----------|----------|
| Crystal system                |            | Cubic     |          |
| Space group                   |            | Iad       |          |
| Lattice parameters            |            |           |          |
| $a = b = c$ (Å)               | 12.0122    | 11.9971   | 11.9913  |
| $\alpha = \beta = \gamma$ (°) | 90         | 90        | 90       |
| Cell volume (Å <sup>3</sup> ) | 1733.263   | 1726.727  | 1724.234 |
| $R_p$                         | 5.12       | 5.11      | 5.48     |
| $\chi^2$                      | 4.24       | 1.88      | 1.93     |

**Table S2.** Atomic parameters of  $Y_{3-x}Ca_xAl_{5-x}Si_xO_{12}:0.4\%Cr^{3+}$  with different  $x$  values

| Atom      | Y       |         |         | Ca      |         |         | Si       |          |          |
|-----------|---------|---------|---------|---------|---------|---------|----------|----------|----------|
| Wyck.     | 24c     |         |         | 24c     |         |         | 24d      |          |          |
| x Value   | 0.25    | 0.5     | 1       | 0.25    | 0.5     | 1       | 0.25     | 0.5      | 1        |
| x         | 0.12500 | 0.12500 | 0.12500 | 0.12500 | 0.12500 | 0.12500 | 0.37500  | 0.37500  | 0.37500  |
| y         | 0.00000 | 0.00000 | 0.00000 | 0.00000 | 0.00000 | 0.00000 | 0.00000  | 0.00000  | 0.00000  |
| z         | 0.25000 | 0.25000 | 0.25000 | 0.25000 | 0.25000 | 0.25000 | 0.25000  | 0.25000  | 0.25000  |
| Occupancy | 0.229   | 0.208   | 0.167   | 0.021   | 0.042   | 0.083   | 0.021    | 0.042    | 0.083    |
| Atom      | Al1     |         |         | Al2     |         |         | O        |          |          |
| Wyck.     | 16a     |         |         | 24d     |         |         | 96h      |          |          |
| x Value   | 0.25    | 0.5     | 1       | 0.25    | 0.5     | 1       | 0.25     | 0.5      | 1        |
| x         | 0.00000 | 0.00000 | 0.00000 | 0.37500 | 0.37500 | 0.37500 | -0.03462 | -0.03898 | -0.03649 |
| y         | 0.00000 | 0.00000 | 0.00000 | 0.00000 | 0.00000 | 0.00000 | 0.04752  | 0.04498  | 0.04988  |
| z         | 0.00000 | 0.00000 | 0.00000 | 0.25000 | 0.25000 | 0.25000 | 0.14942  | 0.14903  | 0.14875  |
| Occupancy | 0.167   | 0.167   | 0.167   | 0.229   | 0.208   | 0.167   | 1.000    | 1.000    | 1.000    |

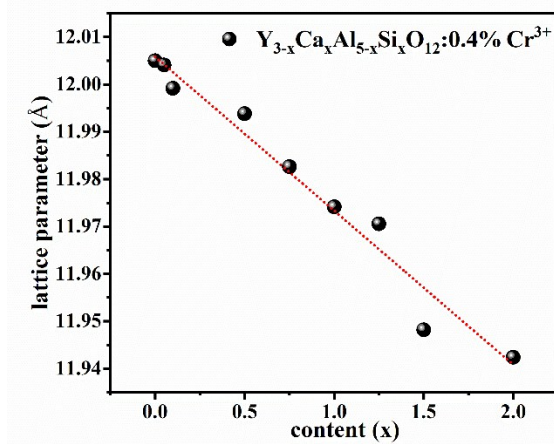

**Figure S2.** Lattice constant of  $Y_{3-x}Ca_xAl_{5-x}Si_xO_{12}:0.4\%Cr^{3+}$  ( $x = 0 - 2$ ) after co-substitution, obtained by structure refinement

**Table S3.** Distortion of ligands with different  $Ca^{2+}-Si^{4+}$  contents

| ligand       | $Ca^{2+}-Si^{4+}$ content | Distortion | Effective coordination |
|--------------|---------------------------|------------|------------------------|
|              | (x)                       | index      | number                 |
| dodecahedron | 0.25                      | 0.03066    | 7.7051                 |
|              | 0.5                       | 0.03020    | 7.7144                 |
|              | 1                         | 0.01935    | 7.8889                 |
| octahedron   | 0.25                      | 0          | 6                      |
|              | 0.5                       | 0          | 6                      |
|              | 1                         | 0          | 6                      |
| tetrahedron  | 0.25                      | 0          | 4                      |
|              | 0.5                       | 0          | 4                      |
|              | 1                         | 0          | 4                      |

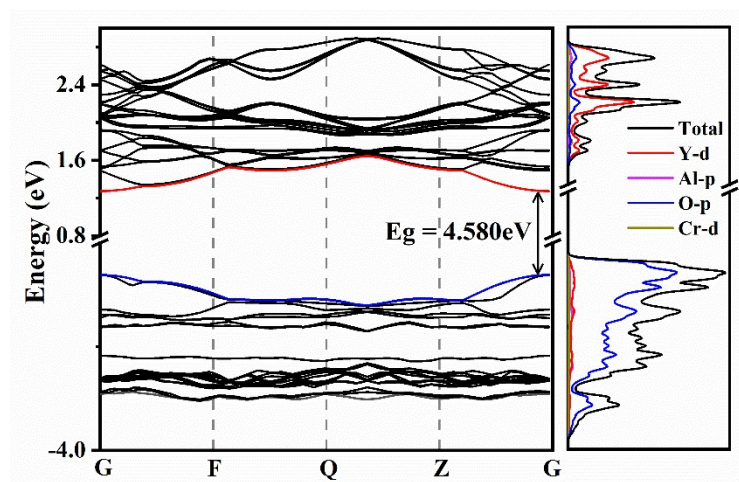

**Figure S3.** PDOS of  $Y_3Al_5O_{12}:Cr^{3+}$  ( $x = 0$ )

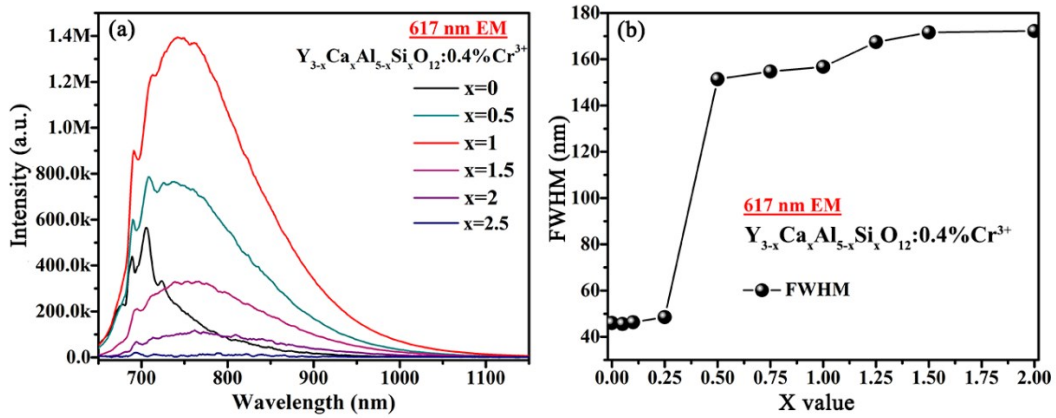

**Figure S4.** (a) Emission spectra and (b) FWHM of  $Y_{3-x}Ca_xAl_{5-x}Si_xO_{12}:0.4\%Cr^{3+}$  at room temperature under 617 nm excitation

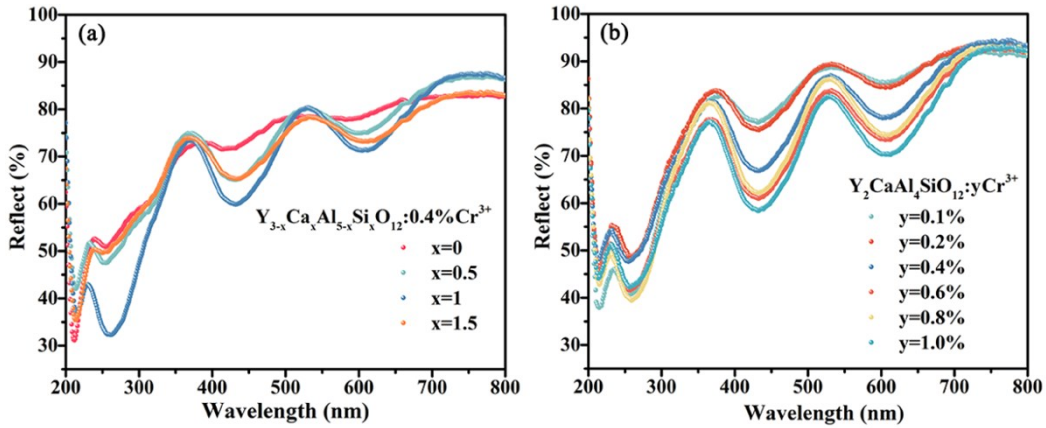

**Figure S5.** Diffuse reflection spectra of (a)  $Y_{3-x}Ca_xAl_{5-x}Si_xO_{12}:0.4\%Cr^{3+}$  ( $x = 1 - 1.5$ ) and (b)  $Y_2CaAl_4SiO_{12}:yCr^{3+}$  ( $y = 0.1 - 1.0\%$ ) at room temperature

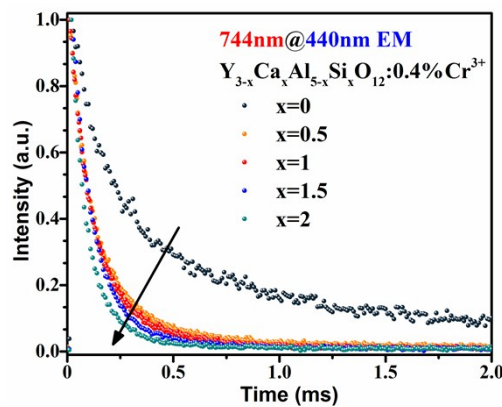

**Figure S6.** Decay time curves of  $Y_{3-x}Ca_xAl_{5-x}Si_xO_{12}:0.4\%Cr^{3+}$  at room temperature

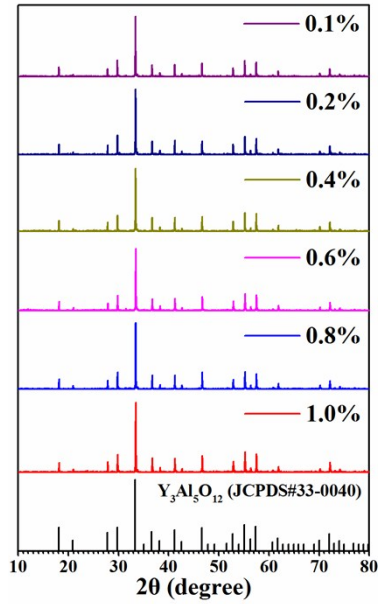

Figure S7. XRD pattern of  $\text{Y}_2\text{CaAl}_4\text{SiO}_{12}:\text{yCr}^{3+}$  and JCPDS reference data of  $\text{Y}_3\text{Al}_5\text{O}_{12}$

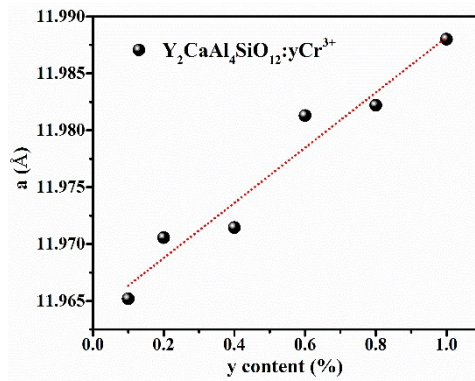

Figure S8. Variation of the lattice constant of  $\text{Y}_2\text{CaAl}_4\text{SiO}_{12}:\text{yCr}^{3+}$  phosphor powders under 440nm excitation

Table S3. The chemical formula for the material in Figure 4

| Abbreviatio<br>n | Chemical<br>formula                               |
|------------------|---------------------------------------------------|
| LaSGG            | $\text{La}_3\text{Sc}_2\text{Ga}_3\text{O}_{12}$  |
| CAGG             | $\text{Ca}_3\text{Al}_2\text{Ge}_3\text{O}_{12}$  |
| GSGG             | $\text{Gd}_3\text{Sc}_2\text{Ga}_3\text{O}_{12}$  |
| CYMGG            | $\text{CaY}_2\text{Mg}_2\text{Ge}_3\text{O}_{12}$ |
| YSGG             | $\text{Y}_3\text{Sc}_2\text{Ga}_3\text{O}_{12}$   |
| YGG              | $\text{Y}_3\text{Ga}_5\text{O}_{12}$              |
| GGG              | $\text{Gd}_3\text{Ga}_5\text{O}_{12}$             |
| LuSGG            | $\text{Lu}_3\text{Sc}_2\text{Ga}_3\text{O}_{12}$  |
| YAG              | $\text{Y}_3\text{Al}_5\text{O}_{12}$              |
| LuGG             | $\text{Lu}_3\text{Al}_5\text{O}_{12}$             |
| LuAG             | $\text{Lu}_3\text{Al}_5\text{O}_{12}$             |

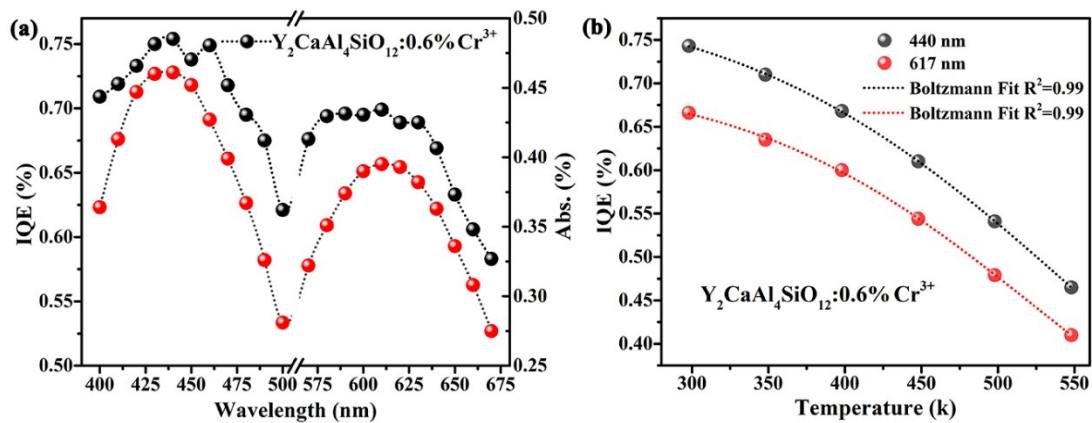

Figure S9. IQE as a function of (a) excitation wavelength and (b) temperature for the  $Y_2CaAl_4SiO_{12}:0.6\%Cr^{3+}$  phosphor

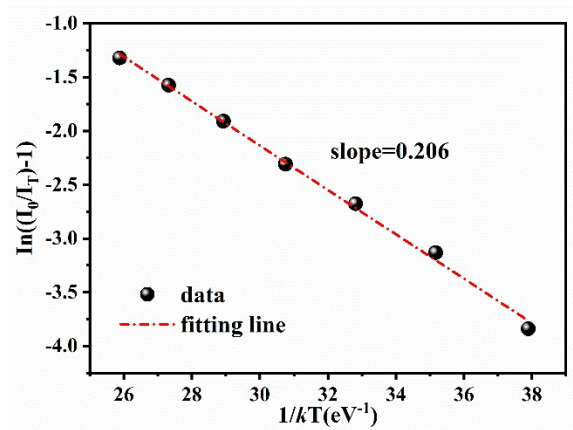

Figure S10. Activation energy using the modified Arrhenius equation for the  $Y_2CaAl_4SiO_{12}:Cr$  phosphor
